# Supplementary material
Source: PubMed Central journal article supplement (PMC4703253)
Supplement: SD5.pdf [file SD5.pdf]

SUPPLEMENTAL TABLE 1

Cladistic distribution of body and head lice collected from patients from the Rethy Health District, Democratic Republic of the Congo, April 2010

| Lice    | Mitochondrial clade | Haplotype (access no) | Looking for pathogens by PCR |                  | Patients   |
|---------|---------------------|-----------------------|------------------------------|------------------|------------|
|         |                     |                       | <i>B. quintana</i>           | <i>Y. pestis</i> |            |
| Louse 1 | Clade D             | KJ850918              | Negative                     | Negative         | Patient 1  |
| Louse 1 | Clade A             | KJ850926              | Positive                     | Negative         |            |
| Louse 2 | Clade D             | KJ850928              | Positive                     | Negative         | Patient 2  |
| Louse 3 | Clade A             | KJ850926              | Positive                     | Negative         |            |
| Louse 4 | Clade D             | KJ850923              | Negative                     | Negative         | Patient 3  |
| Louse 5 | Clade A             | KJ850926              | Positive                     | Negative         |            |
| Louse 6 | Clade D             | KJ850923              | Positive                     | Negative         | Patient 4  |
| Louse 7 | Clade D             | KJ850923              | Negative                     | Negative         |            |
| Louse 1 | Clade D             | KJ850928              | Negative                     | Negative         | Patient 3  |
| Louse 2 | Clade D             | KJ850923              | Negative                     | Negative         |            |
| Louse 1 | Clade D             | KJ850919              | Negative                     | Negative         | Patient 4  |
| Louse 2 | Clade D             | KJ850919              | Negative                     | Negative         |            |
| Louse 3 | Clade D             | KJ850919              | Negative                     | Negative         | Patient 5  |
| Louse 4 | Clade D             | KJ850919              | Negative                     | Negative         |            |
| Louse 5 | Clade D             | KJ850919              | Negative                     | Negative         | Patient 5  |
| Louse 1 | Clade D             | KJ850919              | Negative                     | Negative         |            |
| Louse 2 | Clade D             | KJ850919              | Negative                     | Negative         | Patient 6  |
| Louse 1 | Clade D             | KJ850919              | Negative                     | Negative         |            |
| Louse 2 | Clade D             | KJ850919              | Negative                     | Negative         | Patient 6  |
| Louse 3 | Clade D             | KJ850919              | Negative                     | Negative         |            |
| Louse 4 | Clade D             | KJ850919              | Negative                     | Negative         | Patient 7  |
| Louse 1 | Clade A             | KJ850927              | Negative                     | Negative         |            |
| Louse 2 | Clade D             | KJ850928              | Negative                     | Negative         | Patient 7  |
| Louse 1 | Clade D             | KJ850919              | Negative                     | Negative         |            |
| Louse 2 | Clade D             | KJ850919              | Negative                     | Negative         | Patient 8  |
| Louse 3 | Clade D             | KJ850919              | Negative                     | Negative         |            |
| Louse 4 | Clade D             | KJ850919              | Negative                     | Negative         | Patient 8  |
| Louse 1 | Clade D             | KJ850919              | Negative                     | Negative         |            |
| Louse 2 | Clade D             | KJ850919              | Negative                     | Negative         | Patient 9  |
| Louse 3 | Clade D             | KJ850919              | Negative                     | Negative         |            |
| Louse 4 | Clade D             | KJ850919              | Negative                     | Negative         | Patient 9  |
| Louse 1 | Clade D             | KJ850919              | Negative                     | Negative         |            |
| Louse 2 | Clade D             | KJ850919              | Negative                     | Negative         | Patient 10 |
| Louse 3 | Clade D             | KJ850919              | Negative                     | Negative         |            |
| Louse 4 | Clade A             | KJ850927              | Negative                     | Negative         | Patient 10 |
| Louse 5 | Clade D             | KJ850919              | Negative                     | Negative         |            |
| Louse 6 | Clade D             | KJ850919              | Negative                     | Negative         | Patient 11 |
| Louse 7 | Clade D             | KJ850919              | Negative                     | Negative         |            |
| Louse 1 | Clade A             | KJ850927              | Negative                     | Negative         | Patient 11 |
| Louse 2 | Clade D             | KJ850919              | Negative                     | Negative         |            |
| Louse 1 | Clade D             | KJ850919              | Negative                     | Negative         | Patient 12 |
| Louse 1 | Clade D             | KJ850919              | Negative                     | Negative         |            |
| Louse 2 | Clade D             | KJ850919              | Negative                     | Negative         | Patient 13 |
| Louse 1 | Clade D             | KJ850919              | Negative                     | Negative         |            |
| Louse 2 | Clade D             | KJ850919              | Negative                     | Negative         | Patient 14 |
| Louse 1 | Clade D             | KJ850919              | Negative                     | Negative         |            |
| Louse 2 | Clade D             | KJ850919              | Negative                     | Negative         | Patient 14 |
| Louse 3 | Clade A             | KJ850927              | Negative                     | Negative         |            |
| Louse 1 | Clade D             | KJ850919              | Negative                     | Negative         | Patient 15 |
| Louse 1 | Clade D             | KJ850919              | Negative                     | Negative         |            |
| Louse 2 | Clade D             | KJ850919              | Negative                     | Negative         | Patient 16 |
| Louse 3 | Clade D             | KJ850919              | Negative                     | Negative         |            |
| Louse 4 | Clade D             | KJ850919              | Negative                     | Negative         | Patient 17 |
| Louse 1 | Clade D             | KJ850919              | Negative                     | Negative         |            |
| Louse 2 | Clade D             | KJ850919              | Negative                     | Negative         | Patient 17 |
| Louse 3 | Clade D             | KJ850919              | Negative                     | Negative         |            |
| Louse 4 | Clade D             | KJ850919              | Negative                     | Negative         | Patient 18 |
| Louse 5 | Clade D             | KJ850919              | Negative                     | Negative         |            |
| Louse 1 | Clade A             | KJ850927              | Negative                     | Negative         | Patient 18 |
| Louse 2 | Clade A             | KJ850927              | Negative                     | Negative         |            |
| Louse 3 | Clade A             | KJ850927              | Negative                     | Negative         | Patient 19 |
| Louse 1 | Clade A             | KJ850927              | Negative                     | Negative         |            |
| Louse 2 | Clade D             | KJ850921              | Negative                     | Negative         | Patient 19 |
| Louse 1 | Clade D             | KJ850919              | Negative                     | Negative         |            |
| Louse 2 | Clade D             | KJ850924              | Negative                     | Negative         | Patient 20 |
| Louse 1 | Clade D             | KJ850919              | Negative                     | Negative         |            |
| Louse 1 | Clade D             | KJ850919              | Negative                     | Negative         | Patient 21 |
| Louse 2 | Clade D             | KJ850919              | Negative                     | Negative         |            |
| Louse 1 | Clade D             | KJ850919              | Negative                     | Negative         | Patient 22 |
| Louse 2 | Clade D             | KJ850919              | Negative                     | Negative         |            |
| Louse 3 | Clade D             | KJ850919              | Negative                     | Negative         | Patient 22 |
| Louse 4 | Clade A             | KJ850927              | Negative                     | Negative         |            |
| Louse 5 | Clade A             | KJ850927              | Negative                     | Negative         |            |

(continued)

SUPPLEMENTAL TABLE 1

Continued

| Lice     | Mitochondrial clade | Haplotype (access no) | Looking for pathogens by PCR |                  | Patients   |
|----------|---------------------|-----------------------|------------------------------|------------------|------------|
|          |                     |                       | <i>B. quintana</i>           | <i>Y. pestis</i> |            |
| Louse 1  | Clade D             | KJ850919              | Negative                     | Negative         | Patient 23 |
| Louse 2  | Clade D             | KJ850919              | Negative                     | Negative         |            |
| Louse 3  | Clade D             | KJ850919              | Negative                     | Negative         |            |
| Louse 4  | Clade D             | KJ850919              | Negative                     | Negative         | Patient 24 |
| Louse 1  | Clade D             | KJ850917              | Negative                     | Negative         |            |
| Louse 2  | Clade A             | KJ850927              | Negative                     | Negative         |            |
| Louse 3  | Clade D             | KJ850919              | Negative                     | Negative         | Patient 25 |
| Louse 1  | Clade D             | KJ850918              | Negative                     | Negative         |            |
| Louse 2  | Clade A             | KJ850926              | Negative                     | Negative         |            |
| Louse 3  | Clade A             | KJ850926              | Negative                     | Negative         | Patient 26 |
| Louse 4  | Clade D             | KJ850918              | Negative                     | Negative         |            |
| Louse 5  | Clade A             | KJ850926              | Negative                     | Positive         |            |
| Louse 6  | Clade D             | KJ850918              | Negative                     | Negative         | Patient 27 |
| Louse 7  | Clade A             | KJ850926              | Negative                     | Negative         |            |
| Louse 8  | Clade D             | KJ850918              | Negative                     | Negative         |            |
| Louse 9  | Clade D             | KJ850918              | Negative                     | Negative         | Patient 28 |
| Louse 10 | Clade A             | KJ850926              | Negative                     | Negative         |            |
| Louse 11 | Clade D             | KJ850918              | Negative                     | Negative         |            |
| Louse 12 | Clade D             | KJ850918              | Positive                     | Negative         | Patient 29 |
| Louse 1  | Clade A             | KJ850927              | Negative                     | Negative         |            |
| Louse 2  | Clade D             | KJ850919              | Negative                     | Negative         |            |
| Louse 3  | Clade D             | KJ850919              | Negative                     | Negative         | Patient 30 |
| Louse 1  | Clade A             | KJ850927              | Negative                     | Negative         |            |
| Louse 2  | Clade A             | KJ850927              | Negative                     | Negative         |            |
| Louse 3  | Clade D             | KJ850919              | Negative                     | Negative         | Patient 31 |
| Louse 4  | Clade A             | KJ850927              | Negative                     | Negative         |            |
| Louse 5  | Clade A             | KJ850927              | Negative                     | Negative         |            |
| Louse 6  | Clade A             | KJ850927              | Negative                     | Negative         | Patient 32 |
| Louse 7  | Clade D             | KJ850919              | Negative                     | Negative         |            |
| Louse 8  | Clade A             | KJ850927              | Negative                     | Negative         |            |
| Louse 9  | Clade A             | KJ850927              | Negative                     | Negative         | Patient 33 |
| Louse 10 | Clade A             | KJ850927              | Negative                     | Negative         |            |
| Louse 11 | Clade A             | KJ850927              | Negative                     | Negative         |            |
| Louse 12 | Clade D             | KJ850919              | Negative                     | Negative         | Patient 34 |
| Louse 13 | Clade D             | KJ850919              | Negative                     | Negative         |            |
| Louse 14 | Clade D             | KJ850919              | Negative                     | Negative         |            |
| Louse 15 | Clade D             | KJ850919              | Negative                     | Negative         | Patient 35 |
| Louse 16 | Clade A             | KJ850927              | Negative                     | Negative         |            |
| Louse 17 | Clade A             | KJ850927              | Negative                     | Negative         |            |
| Louse 18 | Clade A             | KJ850927              | Negative                     | Negative         | Patient 36 |
| Louse 19 | Clade A             | KJ850927              | Negative                     | Negative         |            |
| Louse 1  | Clade D             | KJ850919              | Positive                     | Negative         |            |
| Louse 2  | Clade D             | KJ850919              | Positive                     | Negative         | Patient 37 |
| Louse 3  | Clade D             | KJ850919              | Negative                     | Negative         |            |
| Louse 4  | Clade D             | KJ850919              | Positive                     | Positive         |            |
| Louse 5  | Clade A             | KJ850927              | Positive                     | Negative         | Patient 38 |
| Louse 6  | Clade A             | KJ850927              | Positive                     | Negative         |            |
| Louse 7  | Clade A             | KJ850927              | Positive                     | Negative         |            |
| Louse 8  | Clade A             | KJ850927              | Positive                     | Negative         | Patient 39 |
| Louse 9  | Clade A             | KJ850927              | Positive                     | Negative         |            |
| Louse 10 | Clade D             | KJ850919              | Negative                     | Negative         |            |
| Louse 11 | Clade D             | KJ850923              | Negative                     | Negative         | Patient 40 |
| Louse 1  | Clade D             | KJ850923              | Negative                     | Negative         |            |
| Louse 1  | Clade A             | KJ850927              | Positive                     | Positive         |            |
| Louse 1  | Clade A             | KJ850927              | Positive                     | Negative         | Patient 41 |
| Louse 2  | Clade A             | KJ850927              | Positive                     | Negative         |            |
| Louse 1  | Clade D             | KJ850919              | Positive                     | Negative         |            |
| Louse 2  | Clade A             | KJ850927              | Positive                     | Negative         | Patient 42 |
| Louse 3  | Clade D             | KJ850919              | Positive                     | Negative         |            |
| Louse 4  | Clade D             | KJ850919              | Positive                     | Negative         |            |
| Louse 5  | Clade A             | KJ850927              | Positive                     | Negative         | Patient 43 |
| Louse 6  | Clade D             | KJ850919              | Positive                     | Negative         |            |
| Louse 7  | Clade D             | KJ850919              | Positive                     | Negative         |            |
| Louse 8  | Clade D             | KJ850919              | Positive                     | Negative         | Patient 44 |
| Louse 9  | Clade D             | KJ850919              | Positive                     | Negative         |            |
| Louse 10 | Clade D             | KJ850919              | Positive                     | Negative         |            |
| Louse 11 | Clade D             | KJ850919              | Positive                     | Negative         | Patient 45 |
| Louse 12 | Clade D             | KJ850919              | Positive                     | Negative         |            |
| Louse 13 | Clade D             | KJ850919              | Positive                     | Negative         |            |

(continued)

SUPPLEMENTAL TABLE 1  
Continued

| Lice     | Mitochondrial clade | Haplotype (access no) | Looking for pathogens by PCR |                  | Patients   |
|----------|---------------------|-----------------------|------------------------------|------------------|------------|
|          |                     |                       | <i>B. quintana</i>           | <i>Y. pestis</i> |            |
| Louse 14 | Clade D             | KJ850919              | Positive                     | Negative         |            |
| Louse 15 | Clade D             | KJ850919              | Positive                     | Negative         |            |
| Louse 16 | Clade D             | KJ850919              | Positive                     | Negative         |            |
| Louse 17 | Clade D             | KJ850919              | Positive                     | Negative         |            |
| Louse 18 | Clade D             | KJ850919              | Positive                     | Negative         |            |
| Louse 19 | Clade D             | KJ850919              | Positive                     | Negative         |            |
| Louse 20 | Clade D             | KJ850919              | Positive                     | Negative         |            |
| Louse 21 | Clade D             | KJ850919              | Positive                     | Negative         |            |
| Louse 22 | Clade D             | KJ850919              | Positive                     | Negative         |            |
| Louse 23 | Clade D             | KJ850919              | Positive                     | Negative         |            |
| Louse 24 | Clade D             | KJ850919              | Positive                     | Negative         |            |
| Louse 25 | Clade D             | KJ850919              | Positive                     | Negative         |            |
| Louse 26 | Clade D             | KJ850919              | Positive                     | Negative         |            |
| Louse 27 | Clade D             | KJ850919              | Positive                     | Negative         |            |
| Louse 28 | Clade D             | KJ850919              | Positive                     | Negative         |            |
| Louse 29 | Clade D             | KJ850919              | Positive                     | Negative         |            |
| Louse 30 | Clade D             | KJ850919              | Positive                     | Negative         |            |
| Louse 31 | Clade D             | KJ850919              | Positive                     | Negative         |            |
| Louse 32 | Clade D             | KJ850919              | Positive                     | Negative         |            |
| Louse 1  | Clade A             | KJ850927              | Positive                     | Negative         | Patient 34 |
| Louse 2  | Clade A             | KJ850927              | Positive                     | Negative         |            |
| Louse 3  | Clade A             | KJ850927              | Negative                     | Negative         |            |
| Louse 4  | Clade A             | KJ850927              | Positive                     | Negative         |            |
| Louse 5  | Clade A             | KJ850927              | Negative                     | Negative         |            |
| Louse 6  | Clade A             | KJ850927              | Negative                     | Negative         |            |
| Louse 1  | Clade D             | KJ850928              | Negative                     | Negative         | Patient 35 |
| Louse 2  | Clade D             | KJ850923              | Negative                     | Negative         |            |
| Louse 3  | Clade D             | KJ850923              | Negative                     | Negative         |            |
| Louse 1  | Clade D             | KJ850919              | Negative                     | Negative         | Patient 36 |
| Louse 2  | Clade D             | KJ850919              | Positive                     | Negative         |            |
| Louse 3  | Clade D             | KJ850919              | Negative                     | Negative         |            |
| Louse 4  | Clade D             | KJ850919              | Positive                     | Negative         |            |
| Louse 5  | Clade D             | KJ850919              | Negative                     | Negative         |            |
| Louse 6  | Clade D             | KJ850919              | Negative                     | Negative         |            |
| Louse 1  | Clade D             | KJ850925              | Negative                     | Negative         | Patient 37 |
| Louse 2  | Clade D             | KJ850923              | Negative                     | Negative         |            |
| Louse 3  | Clade D             | KJ850923              | Negative                     | Negative         |            |
| Louse 4  | Clade D             | KJ850916              | Negative                     | Negative         |            |
| Louse 5  | Clade A             | KJ850926              | Negative                     | Negative         |            |
